# Supplementary material for: The Role of Circular RNAs in DNA Damage Response and Repair
Source: MDPI journal article supplement (doi:10.3390/cancers13215352), 2021-10-26
Supplement: s1 [file s1]

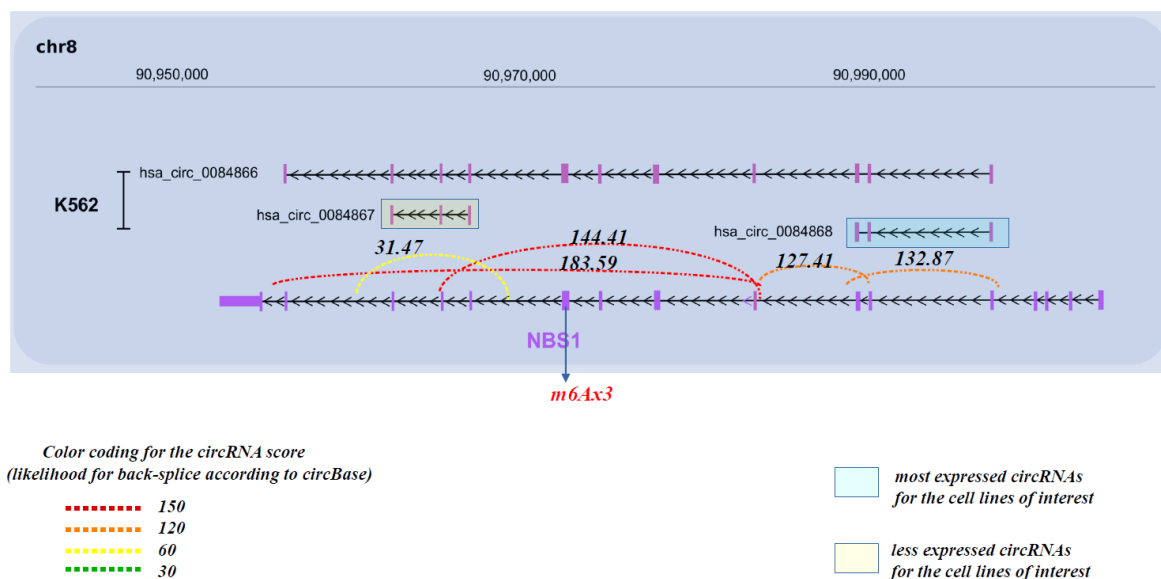

**Figure S1. Potential circRNAs derived from the *NBS1* locus and potential “sponging” abilities. A.** Predicted *NBS1*-derived circRNAs based on next generation sequencing (NGS) data obtained from depicted cancer cells lines as deposited at circBase (<http://www.circbase.org/>). With dashed arced lines we identified the most reliable back-splicing events. Color code ranging from red to orange to yellow, reflect a scale from very high to high scoring of the back-splicing events. Also the most expected versus less expected validation is shown. **B.** The most potent from the expected *NBS1*-derived circRNAs were examined for their binding capacity towards RBPs and miRNAs. For more details see Supplementary Table 1. **C.** Mutational profiles that overlap with the *NBS1* circular RNA transcripts [data from Circvar (<http://soft.bioinfo-minzhao.org/circvar/>), dbSNP (<https://www.ncbi.nlm.nih.gov/snp/>) and COSMIC (<https://cancer.sanger.ac.uk/cosmic/>)] that can influence binding at putative miRNA and RBP interacting regions within the circular RNAs sequence and might alter its sponging capabilities and overall function.

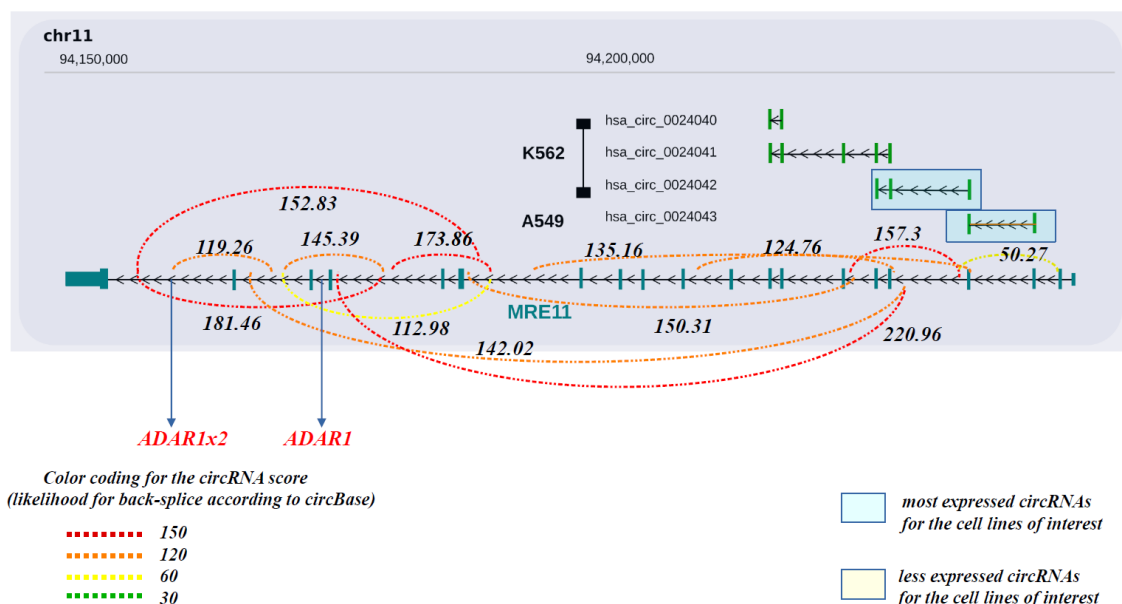

**Figure S2. Potential circRNAs derived from the *MRE11* locus and potential “sponging” abilities. A.** Predicted *MRE11*-derived circRNAs based on next generation sequencing (NGS) data obtained from depicted cancer cells lines as deposited at circBase (<http://www.circbase.org/>). With dashed arced lines we identified the most reliable

back-splicing events. Color code ranging from red to orange to yellow, reflect a scale from very high to high scoring of the back-splicing events. Also the most expected versus less expected validation is shown. **B.** The most potent from the expected *MRE11*-derived circRNAs were examined for their binding capacity towards RBPs and miRNAs. For more details see Supplementary Table 1. **C.** Mutational profiles that overlap with the *MRE11* circular RNA transcripts [data from Circvar (<http://soft.bioinfo-minzhao.org/circvar/>), dbSNP (<https://www.ncbi.nlm.nih.gov/snp/>) and COSMIC (<https://cancer.sanger.ac.uk/cosmic>)] that can influence binding at putative miRNA and RBP interacting regions within the circular RNAs sequence and might alter its sponging capabilities and overall function.

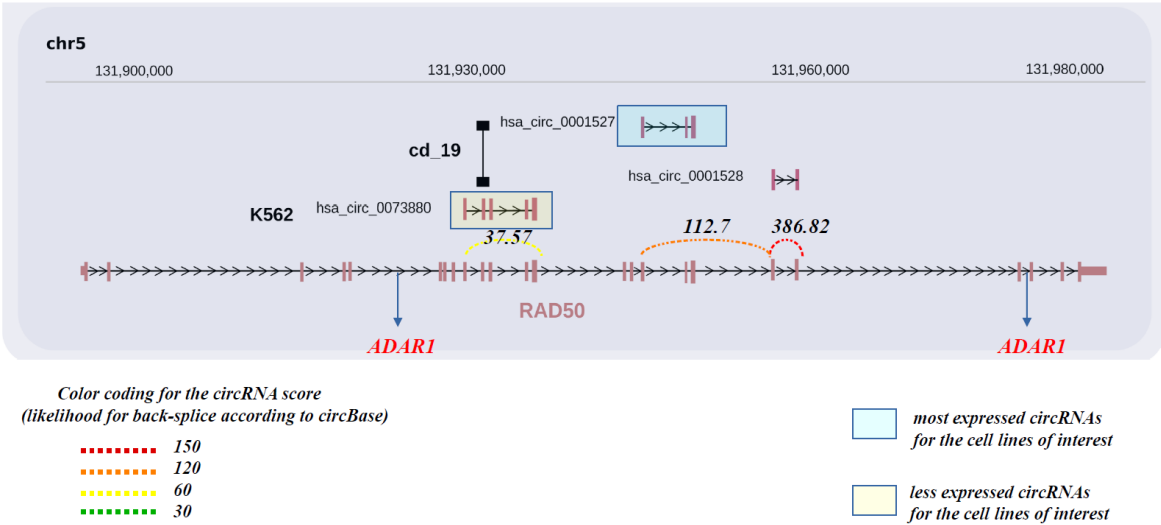

**Figure S3. Potential circRNAs derived from the *RAD50* locus and potential “sponging” abilities.** **A.** Predicted *RAD50*-derived circRNAs based on next generation sequencing (NGS) data obtained from depicted cancer cells lines as deposited at circBase (<http://www.circbase.org/>). With dashed arced lines we identified the most reliable back-splicing events. Color code ranging from red to orange to yellow, reflect a scale from very high to high scoring of the back-splicing events. Also the most expected versus less expected validation is shown. **B.** The most potent from the expected *RAD50*-derived circRNAs were examined for their binding capacity towards RBPs and miRNAs. For more details see Supplementary Table 1. **C.** Mutational profiles that overlap with the *RAD50* circular RNA transcripts [data from Circvar (<http://soft.bioinfo-minzhao.org/circvar/>), dbSNP (<https://www.ncbi.nlm.nih.gov/snp/>) and COSMIC (<https://cancer.sanger.ac.uk/cosmic>)] that can influence binding at putative miRNA and RBP interacting regions within the circular RNAs sequence and might alter its sponging capabilities and overall function.



**Figure S5. Potential circRNAs derived from the *CHK1* (*CHEK1*) locus and potential “sponging” abilities.** **A.** Predicted *CHK1*-derived circRNAs based on next generation sequencing (NGS) data obtained from depicted cancer cells lines as deposited at circBase (<http://www.circbase.org/>). With dashed arced lines we identified the most reliable back-splicing events. Color code ranging from red to orange to yellow, reflect a scale from very high to high scoring of the back-splicing events. Also the most expected versus less expected validation is shown. **B.** The most potent from the expected *CHK1*-derived circRNAs were examined for their binding capacity towards RBPs and miRNAs. For more details see Supplementary Table 1. **C.** Mutational profiles that overlap with the *CHK1* circular RNA transcripts [data from Circvar (<http://soft.bioinfo-minzhao.org/circvar/>), dbSNP (<https://www.ncbi.nlm.nih.gov/snp/>) and COSMIC (<https://cancer.sanger.ac.uk/cosmic>)] that can influence binding at putative miRNA and RBP interacting regions within the circular RNAs sequence and might alter its sponging capabilities and overall function.

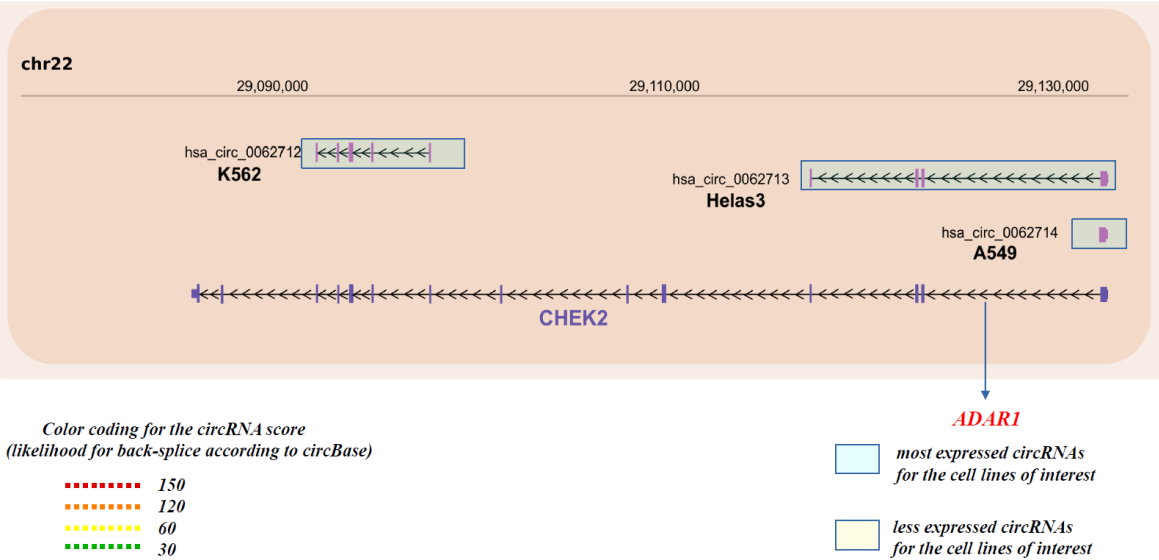

**Figure S6. Potential circRNAs derived from the *CHK2* (*CHEK2*) locus and potential “sponging” abilities.** **A.** Predicted *CHK2*-derived circRNAs based on next generation sequencing (NGS) data obtained from depicted cancer cells lines as deposited at circBase (<http://www.circbase.org/>). With dashed arced lines we identified the most reliable back-splicing events. Color code ranging from red to orange to yellow, reflect a scale from very high to high scoring of the back-splicing events. Also the most expected versus less expected validation is shown. **B.** The most potent from the expected *CHK2*-derived circRNAs were examined for their binding capacity towards RBPs and miRNAs. For more details see Supplementary Table 1. **C.** Mutational profiles that overlap with the *CHK2* circular RNA transcripts [data from Circvar (<http://soft.bioinfo-minzhao.org/circvar/>), dbSNP (<https://www.ncbi.nlm.nih.gov/snp/>) and COSMIC (<https://cancer.sanger.ac.uk/cosmic>)] that can influence binding at putative miRNA and RBP interacting regions within the circular RNAs sequence and might alter its sponging capabilities and overall function.

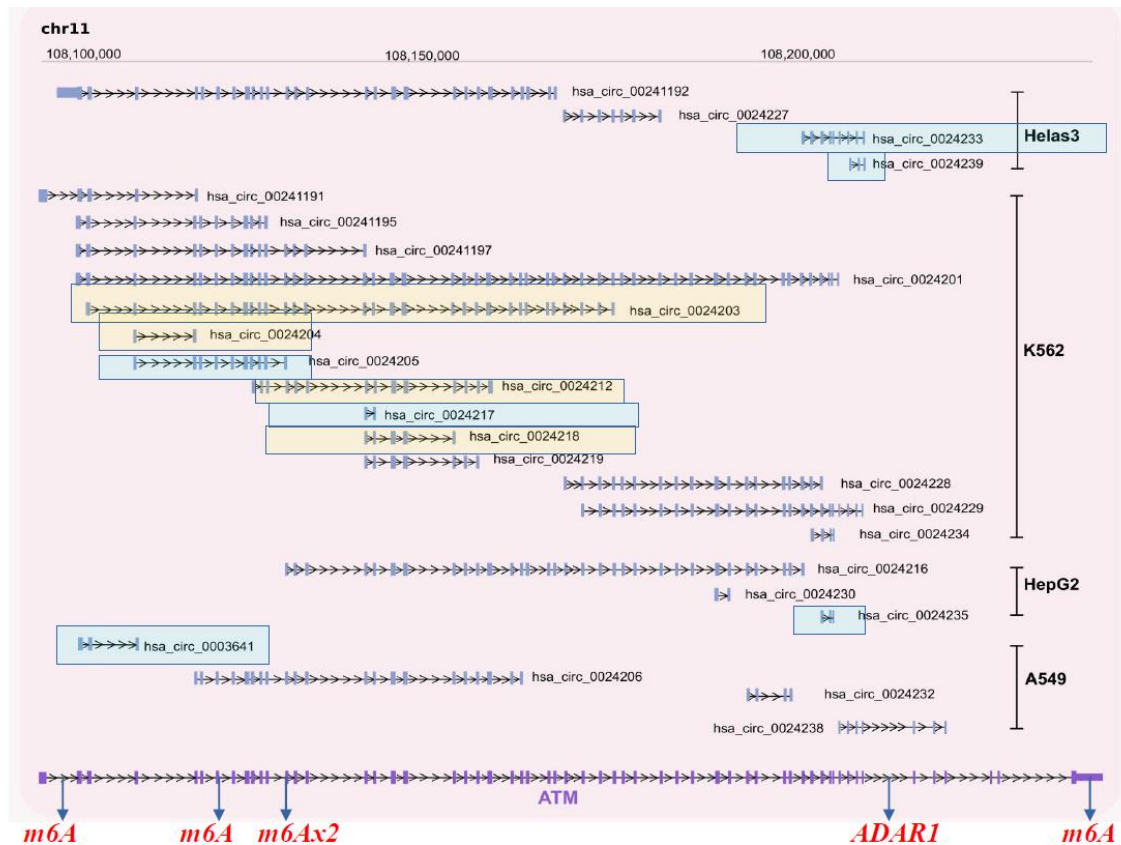

**Figure S7. Potential circRNAs derived from the *ATM* locus and potential “sponging” abilities. A.** Predicted *ATM*-derived circRNAs based on next generation sequencing (NGS) data obtained from depicted cancer cells lines as deposited at circBase (<http://www.circbase.org/>). With dashed arced lines we identified the most reliable back-splicing events. Color code ranging from red to orange to yellow, reflect a scale from very high to high scoring of the back-splicing events. Also the most expected versus less expected validation is shown. **B.** The most potent from the expected *ATM*-derived circRNAs were examined for their binding capacity towards RBPs and miRNAs. For more details see Supplementary Table 1. **C.** Mutational profiles that overlap with the *ATM* circular RNA transcripts [data from Circvar (<http://soft.bioinfo-minzhao.org/circvar/>), dbSNP (<https://www.ncbi.nlm.nih.gov/snp/>) and COSMIC (<https://cancer.sanger.ac.uk/cosmic/>)] that can influence binding at putative miRNA and RBP interacting regions within the circular RNAs sequence and might alter its sponging capabilities and overall function.



**Figure S9. Potential circRNAs derived from the *TP53* locus and potential “sponging” abilities.** **A.** Predicted *TP53*-derived circRNAs based on next generation sequencing (NGS) data obtained from depicted cancer cells lines as deposited at circBase (<http://www.circbase.org/>). With dashed arced lines we identified the most reliable back-splicing events. Color code ranging from red to orange to yellow, reflect a scale from very high to high scoring of the back-splicing events. Also the most expected versus less expected validation is shown. **B.** The most potent from the expected *TP53*-derived circRNAs were examined for their binding capacity towards RBPs and miRNAs. For more details see Supplementary Table 1. **C.** Mutational profiles that overlap with the *TP53* circular RNA transcripts [data from Circvar (<http://soft.bioinfo-minzhao.org/circvar/>), dbSNP (<https://www.ncbi.nlm.nih.gov/snp/>) and COSMIC (<https://cancer.sanger.ac.uk/cosmic>)] that can influence binding at putative miRNA and RBP interacting regions within the circular RNAs sequence and might alter its sponging capabilities and overall function.
